# Supplementary material for: Experimental Selection for Drosophila Survival in Extremely High O2 Environments
Source: PLoS One. 2010 Jul 23;5(7):e11701. doi: 10.1371/journal.pone.0011701 (PMC2909141; doi:10.1371/journal.pone.0011701)
Supplement: Table S1 — Summary of Significant Alteration in Gene Expression in Hyperoxia-Selected Drosophila melanogaster. (0.05 MB XLS) [file pone.0011701.s001.xls]

## Sheet: Gene list
Table S1. Summary of Significant Alteration in Gene Expression in Hyperoxia-Selected Drosophila melanogaster
Probe Set ID	Flybase ID	Gene Symbol	Gene Title	Fold Change	p-value
1638235_at	FBgn0034407	DptB	diptericin-like protein	47.9475	3.68405e-40
1634366_at	FBgn0052185	CG32185	CG32185	40.7407	2.56931e-31
1632719_at	FBgn0000279	CecC	Cecropin	25.5896	6.39821e-13
1627551_s_at	FBgn0012042 /// FBgn0041581	AttA /// AttB	attacin	23.7633	2.41796e-38
1641419_at	FBgn0041579	AttC	attacin	23.4021	1.56314e-38
1627613_at	FBgn0014865	Mtk	metchnikowin	22.8911	1.74757e-38
1625124_at	FBgn0012042	AttA	attacin	16.3093	2.11629e-36
1628405_at	FBgn0036948	CG7298	CG7298	12.5797	4.49131e-35
1632531_at	FBgn0034291	CG5770 /// DyakCG5770	CG5770	10.8384	2.28208e-22
1636566_at	FBgn0052368	CG32368	CG32368	8.5379	2.13242e-24
1631475_at	FBgn0038530	AttD	attacin	6.4598	9.80574e-16
1624945_a_at	FBgn0034289	CG10910	CG10910	5.3808	8.79287e-28
1632882_at	FBgn0037562	CG11671	CG11671	5.2076	1.69839e-23
1633009_a_at	FBgn0036068	CG6640	CG6640	4.3997	8.06462e-22
1631697_at	FBgn0010388	Dro	Drosocin	4.1975	9.10414e-09
1635512_at	FBgn0039316	CG11893	CG11893	3.7292	1.94383e-21
1623790_at	FBgn0051901	CG31901	CG31901	3.6165	1.72113e-20
1632345_at	FBgn0032002	CG8353	CG8353	3.1966	5.82232e-16
1637275_a_at	FBgn0033857	CG13335 /// DyakCG13335	CG13335	3.1843	1.02741e-19
1639268_at	FBgn0033789	CG13324 /// DyakCG13324	CG13324	3.0263	1.32237e-18
1635593_at	FBgn0034756	Cyp6d2	Cyp6d2	2.9896	1.14801e-13
1638021_at	FBgn0027584	CG4757	CG4757	2.8754	6.18585e-11
1630568_at	FBgn0054040	CG34040	CG34040	2.8739	9.69698e-12
1636293_at	FBgn0027544	CG2217	CG2217	2.8087	1.12749e-08
1623732_at	FBgn0051410	CG31410	CG31410	2.7897	8.33512e-16
1630800_s_at	FBgn0054040	CG34040	CG34040	2.7026	4.29044e-09
1631204_at	FBgn0040958	Peritrophin-15b	Dm-peritrophin-15b	2.602	1.3768e-09
1626530_at	FBgn0000278	CecB	Cecropin	2.5835	8.9705e-08
1636490_at	FBgn0043578	PGRP-SB1	PGRP-SB1	2.5178	4.75985e-15
1623757_at	FBgn0005664	Cry	drosocrystallin	2.511	8.85525e-09
1639180_at	FBgn0033926	CG12505	CG12505	2.4645	8.18886e-15
1632683_s_at	FBgn0013437	copiaGIP	gag-int-pol	2.4519	1.00875e-14
1627463_at	FBgn0033659	Damm	Death associated molecule related to Mch2	2.4481	2.65602e-12
1635446_at	FBgn0030929	CG15043 /// DyakCG15043	CG15043	2.4263	2.30133e-14
1633251_at	FBgn0035743	CG15829	CG15829	2.3995	1.07108e-10
1636618_at	FBgn0030836	CG8664	CG8664	2.3589	5.25977e-12
1623812_at	FBgn0036320	CG10943	CG10943	2.3351	4.92814e-08
1639454_at	FBgn0034296	CG10912	CG10912	2.3255	1.31608e-13
1627982_at	FBgn0051077	CG31077	CG31077	2.1808	1.32312e-10
1627807_at	FBgn0032269	w-cup	world cup	2.1418	3.94629e-10
1630555_at	FBgn0053346	CG33346	CG33346	2.0983	3.11744e-11
1632720_at	FBgn0004431	LysX	Lysozyme X	2.0661	9.7575e-11
1634271_at	FBgn0010385	Def	defensin	2.0588	1.18152e-10
1624080_s_at	FBgn0024921	Trn	transportin	2.0434	5.81906e-11
1626309_at	FBgn0036203	CG6004	CG6004	2.0145	1.02164e-10
1641055_at	FBgn0001224	Hsp23	Protein 23	1.9801	5.31587e-10
1627271_at	FBgn0034511	CG13422	CG13422	1.9713	1.11678e-09
1639297_at	FBgn0032087	CG9568 /// DyakCG9568	CG9568	1.9197	1.18187e-09
1639069_at	FBgn0053503	Cyp12d1-d	Cyp12d1-d	1.9169	2.08142e-07
1623256_at	FBgn0034335	GstE1	glutathione-S-transferase	1.8765	4.23621e-09
1639694_s_at	FBgn0033926 /// FBgn0033927	CG10102 /// CG12505	CG10102 /// CG12505	1.8706	3.82765e-09
1631154_at	FBgn0033787	CG13321	CG13321	1.8692	4.52653e-09
1628581_at	FBgn0033786	CG3884	CG3884	1.8583	8.08613e-09
1635525_at	FBgn0030777	CG9672	CG9672	1.8408	6.73548e-09
1625195_s_at	FBgn0003396	shn	schnurri	1.8145	1.18603e-06
1630600_at	FBgn0037724	Fst /// Scm	Frost /// Sex combs on midleg	1.7972	6.84611e-08
1623761_at	FBgn0030040	CG15347 /// DyakCG15347	CG15347	1.7933	2.45323e-08
1630574_at	FBgn0034871	CG3906	CG3906	1.7849	2.43811e-08
1627716_at	FBgn0038067	CG11598	CG11598	1.7775	1.18234e-06
1640103_s_at	FBgn0031489	CG17224	CG17224	1.7604	5.53232e-07
1637350_at	FBgn0051086	CG31086	CG31086	1.7504	9.19657e-08
1625278_s_at	FBgn0051004	CG31004	CG31004	1.7178	1.13105e-06
1632430_at	FBgn0022355	Tsf1	Transferrin	1.7115	1.47356e-07
1636767_at	FBgn0004429	LysP	lysozyme	1.6858	6.49302e-07
1624342_at	FBgn0034295	CG10911 /// DyakCG10911	CG10911	1.6714	3.90365e-07
1641610_at	FBgn0030999	CG7874	CG7874	1.6639	4.78257e-07
1640981_at	FBgn0011670	Mst57Dc	male specific transcript 57D	1.6437	7.9515e-07
1629383_a_at	FBgn0035917	CG6416	CG6416	-1.54131	1.15636e-06
1632111_at	FBgn0000121	Arr2	arrestin	-1.5444	9.60039e-07
1638789_at	FBgn0020439	fau	fau	-1.5456	9.9721e-07
1636953_a_at	FBgn0036672	Lmpt	Limpet	-1.5569	9.05045e-07
1641113_at	FBgn0032789	CG13083	CG13083	-1.55933	5.78849e-07
1633465_at	FBgn0014464	Cp7Fa	Chorion protein a at 7F	-1.56104	5.45611e-07
1631118_s_at	FBgn0013987	MAPk-Ak2	MAP kinase activated protein kinase-2	-1.56299	7.58356e-07
1639210_at	FBgn0000644	Fcp3C	Follicle cell protein 3C	-1.56348	5.24989e-07
1634154_at	FBgn0029697	CG15570	CG15570	-1.56544	7.80767e-07
1641494_at	FBgn0034066	CG8397	CG8397	-1.56568	8.22217e-07
1635584_s_at	FBgn0003721	Tm1	Tropomyosin	-1.57257	3.83812e-07
1639641_at	FBgn0035781	CG8560	CG8560	-1.58178	3.0634e-07
1638361_at	FBgn0033774	CG12374 /// DyakCG12374	CG12374	-1.58228	2.50255e-07
1624907_at	FBgn0029506	Tsp42Ee	tetraspanin 42E	-1.58983	2.35236e-07
1630844_at	FBgn0028526	CG15293	CG15293	-1.59974	1.60792e-07
1636423_at	FBgn0040832	CG8012	CG8012	-1.60282	4.23576e-07
1639295_at	FBgn0033826	CG4734	CG4734	-1.60668	1.9058e-07
1628792_at	FBgn0034474	Obp56g	Odorant-binding protein 56g	-1.6116	9.07205e-08
1635398_at	FBgn0020907	Scp2	Calexcitin	-1.62311	9.71227e-08
1637795_at	FBgn0032025	CG7778 /// DyakCG7778	CG7778	-1.62364	5.6699e-07
1631474_s_at	FBgn0022160	l(2)k05713	mitochondrial GPD	-1.62787	1.51151e-07
1628339_a_at	FBgn0039737	CG7920 /// DsimCG7920	CG7920	-1.6292	7.04146e-08
1623759_at	FBgn0034515	CG13428	CG13428	-1.63372	6.07967e-07
1627162_at	FBgn0051681	CG31681	CG31681	-1.63372	1.5942e-07
1626783_at	FBgn0029765	CG16756 /// DyakCG16756	CG16756	-1.63399	3.26181e-07
1634542_at	FBgn0035471	Sc2	Ubiquitin-63E	-1.63399	4.71997e-08
1629199_at	FBgn0020508	Ag5r2	Antigen 5-related 2	-1.63532	5.383e-08
1625374_at	FBgn0032068	CG9466	CG9466	-1.63934	8.383e-08
1623675_at	FBgn0039685	Obp99b	turn on sex-specificity	-1.63988	4.03961e-07
1639338_at	FBgn0031248	CG11912	CG11912	-1.64285	1.49959e-07
1639196_at	FBgn0031654	Jon25Bii	Jonah 25B	-1.64501	2.70276e-08
1630441_at	FBgn0030439	CG12716	CG12716	-1.65153	2.37675e-07
1633459_a_at	FBgn0020439	fau	fau	-1.65645	1.98712e-08
1641481_at	FBgn0040256	Ugt86Dd	Ugt86Dd	-1.657	3.21167e-07
1641747_s_at	FBgn0033010	Atf6	CG3136	-1.65755	2.32046e-07
1633646_at	FBgn0023077	inaF	inaF	-1.66003	2.26267e-07
1625000_a_at	FBgn0052441	CG32441	CG32441	-1.66667	2.00165e-08
1635848_at	FBgn0025885	Inos	myo-inositol-1-phosphate-synthase	-1.66667	2.14693e-08
1629407_at	FBgn0032126	CG13113	CG13113	-1.67785	2.27013e-08
1637109_s_at	FBgn0036821	CG3961	CG3961	-1.67954	1.62879e-08
1625948_at	FBgn0032144	CG17633	CG17633	-1.68067	7.81192e-09
1641444_a_at	FBgn0040285	Scamp	anon-fast-evolving-1F7	-1.68379	1.15705e-06
1626586_at	FBgn0043535	Obp57a	Odorant-binding protein 57a	-1.68492	3.90503e-08
1630261_a_at	FBgn0004169	up	troponin T	-1.68492	1.39743e-08
1624137_at	FBgn0031249	CG11911	CG11911	-1.68577	7.41683e-09
1633357_at	FBgn0037547	CG7910	CG7910	-1.68919	1.27506e-08
1639323_at	FBgn0044812	TotC	Turandot C	-1.69062	5.83149e-08
1623449_at	FBgn0032014	CG7840	CG7840	-1.69377	5.21902e-09
1625664_at	FBgn0036690	CG14059	CG14059	-1.71174	3.06995e-07
1637395_at	FBgn0032788	CG13084	CG13084	-1.71556	2.5596e-09
1624435_at	FBgn0033132	Tsp42Ej	sunglasses	-1.72087	1.29192e-07
1635161_at	FBgn0028915	CG7532	CG7532	-1.72325	4.41471e-09
1626439_at	FBgn0040718	CG15353	CG15353	-1.73822	4.57722e-08
1630660_at	FBgn0046776	CG14033	CG14033	-1.74886	3.64719e-08
1625710_at	FBgn0051717	CG31717	CG31717	-1.74978	2.31385e-09
1630049_at	FBgn0035982	CG4461	CG4461	-1.75223	1.35646e-09
1635723_s_at	FBgn0053129	CG33129	CG33129	-1.75685	5.90637e-10
1626560_at	FBgn0033807	AQP /// blw	aquaporin /// mitochondrial ATP synthase alpha subunit	-1.75747	3.82433e-08
1633272_at	FBgn0034497	CG9090 /// DsecCG9090 /// DsimCG9090	CG9090	-1.77368	3.81958e-10
1631017_at	FBgn0042119	Cpr65Au	CG18778	-1.78412	1.89815e-10
1623931_s_at	FBgn0030758	CanA-14F	Calcineurin A at 14F	-1.78476	1.46256e-05
1623659_at	FBgn0034470	Obp56d	Odorant-binding protein 56d	-1.78827	1.54981e-10
1635602_at	FBgn0032523	CG16956	CG16956	-1.79372	2.49459e-07
1629520_at	FBgn0028920	CG8997 /// DsimCG8997	CG8997	-1.79759	1.41008e-10
1633914_at	FBgn0001089	Gal	beta-galactosidase-1	-1.79824	8.95239e-08
1640006_at	FBgn0034382	CG18609 /// DyakCG18609	CG18609	-1.80245	6.276e-09
1635086_at	FBgn0029838	CG4666 /// DyakCG4666	CG4666	-1.80505	2.01533e-09
1639773_s_at	FBgn0004435	Galpha49B	G-protein-alpha[[q]]	-1.80995	2.84427e-08
1624074_at	FBgn0034468	Obp56a	Odorant-binding protein 56a	-1.81951	6.37238e-10
1626222_at	FBgn0019928	Ser8	Serine Protease 3	-1.82448	2.23026e-08
1630291_at	FBgn0002869	MtnB	Metallothionein B	-1.82648	8.75666e-11
1636600_a_at	FBgn0038294	Zeelin1	Zeelin1	-1.83284	3.08217e-11
1633031_at	FBgn0034052	CG8299	CG8299	-1.8577	2.64273e-08
1634529_at	FBgn0034711	CG3290	CG3290	-1.8615	5.67126e-09
1624101_at	FBgn0033978	Cyp6a23	Cyp6a23	-1.86289	3.53322e-09
1637403_at	FBgn0028533	CG7953	CG7953	-1.86289	2.0255e-11
1640979_at	FBgn0030484	CG1681	CG1681	-1.87336	1.96487e-11
1626793_at	FBgn0043792	CG30427	CG30427	-1.87688	5.73094e-07
1622974_at	FBgn0038820	CG4000	CG4000	-1.8797	6.80059e-12
1641200_at	FBgn0011281	Pbprp3	Olfactory-specific-F	-1.88005	1.19269e-08
1632453_at	FBgn0037762	CG16905	CG16905	-1.89179	1.29649e-11
1637829_at	FBgn0029821	CG4020	CG4020	-1.90549	4.31558e-10
1624824_at	FBgn0023197	Jon74E	Jonah 74E	-1.91498	1.4185e-12
1637155_at	FBgn0052407	CG32407	CG32407	-1.91571	6.21662e-07
1630532_at	FBgn0032055	CG13091	CG13091	-1.91865	3.33656e-12
1623364_at	FBgn0034761	CG4250	CG4250	-1.9216	6.40709e-12
1626086_at	FBgn0032726	CG10621	selenocysteine methyltransferase	-1.94062	9.97208e-13
1623329_at	FBgn0034318	CG14500	CG14500	-1.94288	1.96374e-12
1633147_at	FBgn0032839	CG10659	CG10659	-1.94932	5.84236e-10
1626000_at	FBgn0032303	CG6508	CG6508	-1.95618	2.58188e-09
1635338_a_at	FBgn0037302	retinophilin /// uta	undertaker	-1.99045	1.94384e-10
1630458_at	FBgn0029948	CheA7a	CheA7a	-1.9984	3.52865e-07
1640401_at	FBgn0004181	Peb	Protein ejaculatory bulb	-2.0008	5.95794e-14
1635549_at	FBgn0028396	TotA	Turandot	-2.00521	6.68485e-14
1625314_at	FBgn0037292	CG2022	CG2022	-2.00562	4.08792e-09
1634786_at	FBgn0040099	lectin-28C	Lectin28C	-2.01329	1.70776e-07
1630589_at	FBgn0037890	CG17734	CG17734	-2.01369	1.86464e-08
1631446_at	FBgn0034582	CG10531	CG10531	-2.0145	1.58004e-10
1633050_at	FBgn0037782	CG12813	CG12813	-2.0202	3.73291e-11
1637660_at	FBgn0035620	CG5150	CG5150	-2.04708	2.98143e-12
1634893_at	FBgn0001128	Gpdh	Glycerol 3 phosphate dehydrogenase	-2.0475	2.14966e-14
1624398_at	FBgn0038130	CG8630	CG8630	-2.05423	1.3926e-09
1633631_at	FBgn0039760	CG9682	CG9682	-2.06356	4.57883e-11
1628020_at	FBgn0031373	CG15358	CG15358	-2.06825	6.77099e-11
1636426_at	FBgn0025827	CG6421	CG6421	-2.07211	2.22359e-10
1638736_at	FBgn0040637	CG11458	CG11458	-2.07857	1.62402e-09
1629323_at	FBgn0052644	CG32644	CG32644	-2.12766	3.7883e-12
1634935_a_at	FBgn0033446	CG1648	CG1648	-2.13038	7.60908e-16
1632923_at	FBgn0037288	CG14661	CG14661	-2.13721	8.77026e-16
1627195_at	FBgn0052642	CG32642	CG32642	-2.145	1.04045e-15
1638066_at	FBgn0010403	Os-E	Olfactory-specific E	-2.14823	8.95558e-11
1629313_at	FBgn0030837	CG8661 /// DyakCG8661	CG8661	-2.1561	1.86143e-15
1635379_at	FBgn0051300	CG31300	CG31300	-2.15889	4.43398e-07
1636510_a_at	FBgn0039114	Lsd-1	Lipid storage droplet-1	-2.2119	9.99369e-17
1636865_at	FBgn0010401	Os-C	Os-C	-2.22074	3.43291e-09
1633218_a_at	FBgn0035978	UGP	UGP	-2.22519	1.35091e-05
1640201_at	FBgn0037302	retinophilin /// uta	undertaker	-2.22618	1.34649e-13
1633675_at	FBgn0050008	CG30008	CG30008	-2.23964	1.61709e-17
1623558_at	FBgn0033728	Cpr49Ae	CG8505	-2.28363	5.61188e-18
1638528_at	FBgn0039755	CG15531	CG15531	-2.28728	2.95374e-17
1637701_at	FBgn0050042	Cpr49Ab	CG30042	-2.30787	4.31017e-18
1634449_at	FBgn0037764	CG9459	CG9459	-2.31267	5.39507e-11
1637754_at	FBgn0037765	CG9458	CG9458	-2.32342	1.37618e-16
1633308_at	FBgn0039030	CG6660	CG6660	-2.34247	1.15805e-15
1623027_s_at	FBgn0039475 /// FBgn0039476	CG6271 /// CG6277	CG6271 /// CG6277	-2.35905	6.61352e-19
1629317_at	FBgn0042201	Nplp3	neuropeptide-like precursor 3	-2.38892	8.73325e-20
1629184_at	FBgn0036833	CG3819	CG3819	-2.45218	2.73279e-19
1623589_a_at	FBgn0038983	CG5326	CG5326	-2.46305	5.74879e-16
1629430_s_at	FBgn0030362	regucalcin	regucalcin	-2.48139	2.75349e-19
1624519_at	FBgn0004623	Gbeta76C	guanine nucleotide regulatory protein beta subunit	-2.49314	2.84142e-20
1635868_at	FBgn0039471	CG6295	CG6295	-2.49563	2.71281e-21
1640881_at	FBgn0035343	CG16762	CG16762	-2.51572	6.65389e-08
1638774_at	FBgn0037763	CG16904	CG16904	-2.53807	8.34861e-22
1633378_at	FBgn0016675	Lectin-galC1	galactin	-2.5413	1.92405e-18
1639269_a_at	FBgn0011693	Pdh	pigment cell dehydrogenase reductase	-2.57798	1.53578e-21
1641474_s_at	FBgn0014454 /// FBgn0051904	Acp1 /// CG31904	CG31904 /// Adult cuticle protein 1	-2.61028	1.18638e-21
1636583_at	FBgn0036996	CG5932	CG5932	-2.66667	3.56869e-23
1633820_at	FBgn0029172	Fad2	Fad2	-2.67881	1.23445e-23
1636885_at	FBgn0038450	CG17560	CG17560	-2.76625	7.08828e-24
1631529_at	FBgn0011832	Ser12	Serine protease 12	-2.80505	8.80266e-10
1628235_at	FBgn0031942	CG7203	CG7203	-2.80978	2.82653e-25
1632393_at	FBgn0032265	CG18301	CG18301	-2.81928	3.09059e-11
1635229_at	FBgn0052072	Elo68alpha	CG32072	-3.0553	4.71286e-18
1639671_at	FBgn0033483	egr	eiger	-3.08261	3.90229e-06
1641190_at	FBgn0035666	Jon65Aii	Jonah 65A	-3.12402	9.28509e-29
1641292_at	FBgn0052834	CG32834	CG32834	-3.13775	1.09018e-15
1634409_at	FBgn0028537	CG31775	CG31775	-3.29272	1.97436e-21
1629308_at	FBgn0039472	CG17192	CG17192	-3.53232	8.98534e-33
1633499_at	FBgn0040074	retinin	retinin	-3.5791	7.27881e-32
1625760_at	FBgn0050272	CG30272	CG30272	-3.60881	1.83497e-08
1640052_at	FBgn0040705	CG15434	CG15434	-3.72578	3.79266e-08
1628699_at	FBgn0002563	Lsp1beta	Larval serum protein 1 beta	-4.02091	6.14243e-34
1633344_at	FBgn0038819	Cpr92F	CG5494	-4.66418	1.05249e-19
1639418_at	FBgn0020765	Acp65Aa	Acp65Aa	-4.68384	6.71257e-36
1635072_at	FBgn0031940	CG7214	CG7214	-5.06586	2.57784e-42
1630501_a_at	FBgn0013988	Strn-Mlck	Stretchin	-5.51268	1.10424e-22
1626700_at	FBgn0000047	Act88F	arthrin	-6.23441	2.91289e-46
1634076_at	FBgn0030098	CG12057	CG12057	-8.05802	1.78069e-51
1637335_at	FBgn0005633	fln	flightin	-9.62464	4.36668e-49
1634310_at	FBgn0033027	TpnC4	TpnC4	-13.5135	4.65588e-55
Note: Diptericin was up-regulated in SO2A flies but was not included in this table, because the target sequence of diptericin gene
from Affymetrix GeneChip (Release 3.1) was mismatched with the current annotated sequence (Release 7.1). This up-regulation
was confirmed by real time PCR.
