# Supplementary material for: Experimental Selection for Drosophila Survival in Extremely High O2 Environments
Source: PLoS One. 2010 Jul 23;5(7):e11701. doi: 10.1371/journal.pone.0011701 (PMC2909141; doi:10.1371/journal.pone.0011701)
Supplement: Table S2 — Summary of Significant Changes in GO-based Gene Expression Profiles in Hyperoxia-Selected Drosophila melanogaster. (0.03 MB XLS) [file pone.0011701.s002.xls]

## Sheet: Gene ontology
Table S2. Summary of Significant Changes in GO-based Gene Expression Profiles in Hyperoxia-Selected Drosophila melanogaster
GOID	GO Name	Number Changed	Number Measured	Number in GO	Percent Changed	Percent Present	Z Score	P value
6961	antibacterial humoral response (sensu Protostomia)	9	16	43	56.25	37.2093	16.375	0
6960	antimicrobial humoral response (sensu Protostomia)	9	23	70	39.1304	32.8571	13.464	0
16065	humoral defense mechanism (sensu Protostomia)	9	23	70	39.1304	32.8571	13.464	0
42742	defense response to bacteria	11	39	112	28.2051	34.8214	12.411	0
9617	response to bacteria	11	39	112	28.2051	34.8214	12.411	0
19731	antibacterial humoral response	9	28	56	32.1429	50	12.078	0
7202	phospholipase C activation	2	2	3	100	66.6667	10.434	0
19730	antimicrobial humoral response	9	38	97	23.6842	39.1753	10.153	0
50830	defense response to Gram-positive bacteria	5	13	30	38.4615	43.3333	9.936	0
6952	defense response	14	89	342	15.7303	26.0234	9.915	0
51707	response to other organism	11	59	172	18.6441	34.3023	9.747	0
6959	humoral immune response	9	41	102	21.9512	40.1961	9.712	0
9607	response to biotic stimulus	14	93	355	15.0538	26.1972	9.645	0
16056	rhodopsin mediated signaling	3	6	8	50	75	8.872	0
9613	response to pest\, pathogen or parasite	9	52	130	17.3077	40	8.421	0
6955	immune response	11	75	186	14.6667	40.3226	8.401	0
50829	defense response to Gram-negative bacteria	4	13	59	30.7692	22.0339	7.851	0
9586	rhodopsin mediated phototransduction	4	15	21	26.6667	71.4286	7.24	0
7602	phototransduction	5	26	43	19.2308	60.4651	6.684	0
9583	detection of light stimulus	5	29	46	17.2414	63.0435	6.255	0
9581	detection of external stimulus	5	34	58	14.7059	58.6207	5.662	0
50896	response to stimulus	29	611	1321	4.74632	46.2528	5.643	0
9628	response to abiotic stimulus	13	201	412	6.46766	48.7864	5.019	0
6950	response to stress	13	207	451	6.28019	45.898	4.89	0
6629	lipid metabolism	11	193	457	5.69948	42.2319	4.106	0
19236	response to pheromone	3	7	8	42.8571	87.5	8.163	0.001
19835	cytolysis	2	4	10	50	40	7.243	0.001
9416	response to light stimulus	5	43	84	11.6279	51.1905	4.85	0.001
9582	detection of abiotic stimulus	5	46	75	10.8696	61.3333	4.63	0.001
51606	detection of stimulus	5	46	75	10.8696	61.3333	4.63	0.001
9314	response to radiation	5	48	94	10.4167	51.0638	4.494	0.001
50874	organismal physiological process	22	621	1340	3.54267	46.3433	3.363	0.001
6030	chitin metabolism	7	103	165	6.79612	62.4242	3.826	0.002
7601	visual perception	5	53	78	9.43396	67.9487	4.184	0.003
50953	sensory perception of light stimulus	5	53	78	9.43396	67.9487	4.184	0.003
6044	N-acetylglucosamine metabolism	7	108	172	6.48148	62.7907	3.672	0.004
6040	amino sugar metabolism	7	108	172	6.48148	62.7907	3.672	0.004
6041	glucosamine metabolism	7	108	172	6.48148	62.7907	3.672	0.004
5975	carbohydrate metabolism	14	333	606	4.2042	54.9505	3.348	0.004
6633	fatty acid biosynthesis	3	17	31	17.6471	54.8387	4.912	0.005
44264	cellular polysaccharide metabolism	7	115	187	6.08696	61.4973	3.471	0.006
5976	polysaccharide metabolism	7	115	187	6.08696	61.4973	3.471	0.006
46394	carboxylic acid biosynthesis	3	19	33	15.7895	57.5758	4.584	0.007
16053	organic acid biosynthesis	3	19	33	15.7895	57.5758	4.584	0.007
9605	response to external stimulus	5	79	156	6.32911	50.641	3.034	0.01
7600	sensory perception	9	195	252	4.61538	77.3809	2.979	0.01
15979	photosynthesis	1	1	35	100	2.85714	7.377	0.012
16059	deactivation of rhodopsin mediated signaling	2	9	11	22.2222	81.8182	4.604	0.014
16998	cell wall catabolism	2	9	26	22.2222	34.6154	4.604	0.017
42048	olfactory behavior	3	29	60	10.3448	48.3333	3.46	0.018
16058	maintenance of rhodopsin mediated signaling	1	1	2	100	50	7.377	0.019
6072	glycerol-3-phosphate metabolism	2	12	29	16.6667	41.3793	3.87	0.019
6020	myo-inositol metabolism	1	1	1	100	100	7.377	0.02
6021	myo-inositol biosynthesis	1	1	1	100	100	7.377	0.02
7200	G-protein signaling\, coupled to IP3 second messenger (phospholipase C activating)	2	14	86	14.2857	16.2791	3.511	0.02
48015	phosphoinositide-mediated signaling	2	14	86	14.2857	16.2791	3.511	0.02
7635	chemosensory behavior	3	30	64	10	46.875	3.378	0.021
6964	anti-Gram-negative bacterial polypeptide induction	1	1	2	100	50	7.377	0.023
6631	fatty acid metabolism	3	32	56	9.375	57.1429	3.223	0.024
16042	lipid catabolism	3	40	197	7.5	20.3046	2.712	0.029
44262	cellular carbohydrate metabolism	10	266	463	3.7594	57.4514	2.429	0.029
45297	post-mating behavior	2	12	16	16.6667	75	3.87	0.032
6071	glycerol metabolism	2	17	39	11.7647	43.5897	3.088	0.032
19751	polyol metabolism	2	17	39	11.7647	43.5897	3.088	0.032
8610	lipid biosynthesis	4	64	102	6.25	62.7451	2.681	0.033
42628	mating plug formation	1	2	2	50	100	5.121	0.038
42221	response to chemical stimulus	6	135	278	4.44444	48.5611	2.321	0.042
46131	pyrimidine ribonucleoside metabolism	1	2	2	50	100	5.121	0.044
46087	cytidine metabolism	1	2	2	50	100	5.121	0.044
19915	sequestering of lipid	1	2	2	50	100	5.121	0.046
9409	response to cold	1	3	9	33.3333	33.3333	4.103	0.048
9116	nucleoside metabolism	2	20	38	10	52.6316	2.756	0.048
