# Supplementary material for: Experimental Selection for Drosophila Survival in Extremely High O2 Environments
Source: PLoS One. 2010 Jul 23;5(7):e11701. doi: 10.1371/journal.pone.0011701 (PMC2909141; doi:10.1371/journal.pone.0011701)
Supplement: Table S3 — Survival of P-element Insertion lines and da-Gal4>UAS-AMP lines in 90% O2 (Score: 0, no survival; 1, reaching larvae stage; 2, reaching pupae stage; 3, reaching adult stage). (0.03 MB XLS) [file pone.0011701.s003.xls]

## Sheet: Adult P-elements
Table S3. Survival of P-element Insertion lines and da-Gal4>UAS-AMP lines in 90% O2 (Score: 0, no survival; 1, reaching larvae stage; 2, reaching pupae stage; 3, reaching adult stage)
Flybase ID	Symbol	Gene Name	Fold	Stock#	Genotype	Survival score (Eclosion %) in 90% O2
FBgn0003396	shn	schnurri	1.8145	11386	cn[1] P{ry[+t7.2]=PZ}shn[04738]/CyO; ry[506]	0
FBgn0033926	CG12505	CG12505	2.4645	12770	w[1118]; P{w[+mGT]=GT1}BG01371	0
FBgn0001224	Hsp23	Heat shock protein 23	1.9801	12542	w[1118]; P{w[+mGT]=GT1}BG01483	0
FBgn0027584	CG4757	CG4757	2.8754	17801	w[1118]; PBac{w[+mC]=PB}CG4757[c07133]/TM6B, Tb[1]	0
FBgn0038450	CG17560	CG17560	-2.76625	18135	w[1118]; PBac{w[+mC]=RB}CG17560[e03221]	0
FBgn0038067	CG11598	CG11598	1.7775	18297	w[1118]; PBac{w[+mC]=WH}CG11598[f00150]	0
FBgn0035343	CG16762	CG16762	-2.51572	18349	w[1118]; PBac{w[+mC]=WH}CG16762[f00614]	0
FBgn0051901	CG31901	CG31901	3.6165	18287	w[1118]; PBac{w[+mC]=WH}CG31901[f00026]	0
FBgn0052368	CG32368	CG32368	8.5379	15663	y[1] w[67c23]; P{w[+mC] y[+mDint2]=EPgy2}EY03610	0
FBgn0038294	Zeelin1	Zeelin1	-1.83284	20068	y[1] w[67c23]; P{w[+mC] y[+mDint2]=EPgy2}Zeelin1[EY03476]/TM3, Sb[1] Ser[1]	0
FBgn0046776	CG14033	CG14033	-1.74886	10504	y[1] w[67c23]; P{w[+mC]=lacW}l(2)k01302[k01302]/CyO	0
FBgn0033446	CG1648	CG1648	-2.13038	10525	y[1] w[67c23]; P{w[+mC]=lacW}l(2)k03111[k03111]/CyO	0
FBgn0003396	shn	schnurri	1.8145	10478	y[1] w[67c23]; P{w[+mC]=lacW}shn[k00401]/CyO	0
FBgn0046776	CG14033	CG14033	-1.74886	14403	y[1] w[67c23]; P{y[+mDint2] w[BR.E.BR]=SUPor-P}KG01923	0
FBgn0037890	CG17734	CG17734	-2.01369	14306	y[1] w[67c23]; P{y[+mDint2] w[BR.E.BR]=SUPor-P}KG06609 ry[506]	0
FBgn0025885	Inos	Inos	-1.66667	14921	y[1]; P{y[+mDint2] w[BR.E.BR]=SUPor-P}Inos[KG07679]/CyO; ry[506]	0
FBgn0003396	shn	schnurri	1.8145	14164	y[1]; P{y[+mDint2] w[BR.E.BR]=SUPor-P}KG00695; ry[506]	0
FBgn0003396	shn	schnurri	1.8145	15161	y[1]; P{y[+mDint2] w[BR.E.BR]=SUPor-P}KG09116; ry[506]	0
FBgn0053129	CG33129	CG33129	-1.75685	15213	y[1]; P{y[+mDint2] w[BR.E.BR]=SUPor-P}KG09776; ry[506]	0
FBgn0030484	CG1681	CG1681	-1.87336	18975	w[1118] PBac{WH}CG1681f06400	1
FBgn0039316	CG11893	CG11893	3.7292	11307	w[1118]; PBac{w[+mC]=PB}CG11893[c03576]	1
FBgn0031940	CG7214	CG7214	-5.06586	10653	w[1118]; PBac{w[+mC]=PB}CG7214[c01614]	1
FBgn0013988	Strn-Mlck	Stretchin-Mlck	-5.51268	11089	w[1118]; PBac{w[+mC]=PB}Strn-Mlck[c02860]/CyO	1
FBgn0052441	CG32441	CG32441	-1.66667	18449	w[1118]; PBac{w[+mC]=WH}CG32441[f01564]	1
FBgn0020439	fau	fau	-1.5456	18448	w[1118]; PBac{w[+mC]=WH}fau[f01541]	1
FBgn0023077	inaF	inaF	-1.66003	13482	y[1] P{y[+mDint2] w[BR.E.BR]=SUPor-P}inaF[KG02499]	1
FBgn0000278	CecB	Cecropin B	2.5835	16163	y[1] w[1118]; PBac{5HPw+}CecB{B193]	1
FBgn0037890	CG17734	CG17734	-2.01369	19856	y[1] w[67c23]; P{w[+mC] y[+mDint2]=EPgy2}CG17734[EY06693]	1
FBgn0038983	CG5326	CG5326	-2.46305	20947	y[1] w[67c23]; P{w[+mC] y[+mDint2]=EPgy2}EY14575	1
FBgn0051077	CG31077	CG31077	2.1808	18451	w[1118]; PBac{w[+mC]=WH}CG31077[f01593]	2
FBgn0029838	CG4666	CG4666	-1.80505	12674	w[1118] P{w[+mGT]=GT1}BG02331	2
FBgn0033132	Tsp42Ej	Tetraspanin 42Ej	-1.72087	19159	w[1118]; P{w[+mC]=XP}Tsp42Ej[d01125]	2
FBgn0038983	CG5326	CG5326	-2.46305	12694	w[1118]; P{w[+mGT]=GT1}CG5346[BG02475]	2
FBgn0034335	GstE1	Glutathione S transferase E1	1.8765	17876	w[1118]; PBac{RB}GstE1e00657	2
FBgn0030758	CanA-14F	Calcineurin A at 14F	-1.78476	17478	y[1] w[67c23] P{w[+mC] y[+mDint2]=EPgy2}CanA-14F[EY08594]	2
FBgn0042201	Nplp3	Neuropeptide-like precursor 3	-2.38892	17988	w[1118]; PBac{w[+mC]=RB}Nplp3[e01799]	2
FBgn0035620	CG5150	CG5150	-2.04708	18832	w[1118]; PBac{w[+mC]=WH}CG5150[f05027]	2
FBgn0033659	Damm	Death associated molecule related to Mch2	2.4481	18524	w[1118]; PBac{w[+mC]=WH}Damm[f02209]	2
FBgn0032068	TotC	Turandot C	-1.69062	18460	w[1118]; PBac{w[+mC]=WH}TotC[f01700]/TM6B, Tb[1]	2
FBgn0023077	inaF	inaF	-1.66003	19957	y[1] w[67c23] P{w[+mC] y[+mDint2]=EPgy2}inaF[EY09517]	2
FBgn0041581	AttB	Attacin-B	23.7633	13961	y[1] w[67c23]; P{SUPor-P}KG03543	2
FBgn0032055	CG13091	CG13091	-1.91865	15973	y[1] w[67c23]; P{w[+mC] y[+mDint2]=EPgy2}CG13091[EY06744]	2
FBgn0010388	Dro	Drosocin	4.1975		w; uas-Dro,imd; uas-Dro,spz/TM6C	2
FBgn0000279	Cec	Cecropin	25.5896		w; uas-CecA,imd; uas-CecA, spz/TM6C	2
FBgn0003721	Tm1	Tropomyosin 1	-1.57257	20344	y[1] w[67c23]; P{w[+mC] y[+mDint2]=EPgy2}Tm1[EY12089]/TM3, Sb[1] Ser[1]	3 (30%)
FBgn0001128	Gpdh	Glycerol 3 phosphate dehydrogenase	-2.0475	20123	y[1] w[67c23]; P{w[+mC] y[+mDint2]=EPgy2}Gpdh[EY01534]	3 (36%)
FBgn0035978	UGP	UGP	-2.22519	20776	y[1] w[67c23]; P{w[+mC] y[+mDint2]=EPgy2}UGP[EY13829] CG32040[EY13829]/TM3, Sb[1] Ser[1]	3 (49%)
FBgn0053129	CG33129	CG33129	-1.75685	12754	w[1118]; P{w[+mGT]=GT1}CG33129[BG02672]	3 (61%)
FBgn0053129	CG33129	CG33129	-1.75685	19104	w[1118]; PBac{w[+mC]=WH}CG33129[f07745]	3 (33%)
FBgn0012042 /// FBgn0041581	Att	Attacin	23.7633		w;uas-Att,imd; uas-Att,spz/TM6C	3 (37%)
FBgn0034407	Dpt	Diptericin	47.9475		w; uas-Dipt, imd, DiptD/Cyo; spz/TM3sb	3 (48%)
51 line
47 element
32 down line 15 up line
26 down gene 13 up gene
