# Supplementary material for: Experimental Selection for Drosophila Survival in Extremely High O2 Environments
Source: PLoS One. 2010 Jul 23;5(7):e11701. doi: 10.1371/journal.pone.0011701 (PMC2909141; doi:10.1371/journal.pone.0011701)
Supplement: Table S4 — List of Primers Used in the Current Studies. (0.02 MB XLS) [file pone.0011701.s004.xls]

## Sheet: primers
Table S4. List of Primers Used in the Current Studies
Gene Name	Primer Sequence
Diptericin B	Forward:	gccacgagattggactgaat
	Reversed:	tttccagctcggttctgagt
Diptericin	Forward:	gtgcctgggcttatccctat
	Reversed:	gttcaggctgcagattcaca
Attacin	Forward:	acaatgtggtgggtcaggtt
	Reversed:	aaagttccgccagttgtgac
Cecropin	Forward:	cttcgtctttgtggcactca
	Reversed:	cagcttcctaagccaaccag
Drosomycin	Forward:	ttgtcctaatggaggccaac
	Forward:	ggcacttttctccactccag
Metchnikowin	Reversed:	tcttggagcgatttttctgg
	Forward:	gctctgccagcactgatgta
basket	Reversed:	cgcaaaggaacttggaagag
	Forward:	atttggatgacctggcagag
eiger	Reversed:	gttttcgcgcttttcttttg
	Forward:	atggtgcccttttcagattg
Turandot C	Forward:	ttgccctgctcctgattagt
	Reversed:	cagattccctttcctcgtca
Tropomyosin 1	Forward:	aacagttgccaaaccgaaac
	Reversed:	tggacttctccttcgcctta
Glycerol 3 phosphate dehydrogenase	Forward:	tgaggcgtttgtgacttctg
	Reversed:	tttccttctccagctcctca
CG33129	Forward:	ccaaaaagagcgtccaagag
	Forward:	cggccttctgtttgttcttc
UGP	Reversed:	gcctgagaatgctgtgatga
	Forward:	tgcatacctgctcgttcttg
actin	Reversed:	ctaacctcgccctctcctct
	Forward:	gcagccaagtgtgagtgtgt
